# Supplementary material for: Households access to improved drinking water sources and toilet facilities in Ethiopia: a multilevel analysis based on 2016 Ethiopian Demographic and Health Survey
Source: PubMed Central journal article supplement — BMJ Open. 2021 Mar 18;11(3):e042071. doi: 10.1136/bmjopen-2020-042071 (PMC7978246; doi:10.1136/bmjopen-2020-042071), 2021-03-18
Supplement: bmjopen-2020-042071supp001.pdf [file bmjopen-2020-042071supp001.pdf]

Supplementary Table 1: Regional distribution of access to improved drinking water sources and toilet facilities in Ethiopia, EDHS, 2016.

| Region            | Source of drinking water |                    | Toilet facilities  |                   |
|-------------------|--------------------------|--------------------|--------------------|-------------------|
|                   | Unimproved               | Improved           | Unimproved         | Improved          |
| Tigray            | 410 (23.64%)             | 1,324 (76.36%)     | 1,380 (79.58%)     | 354 (20.42%)      |
| Afar              | 627 (51.39%)             | 593 (48.61%)       | 1,032 (84.59%)     | 188 (15.41%)      |
| Amhara            | 741 (38.96%)             | 1,161 (61.04%)     | 1,782 (93.69%)     | 120 (6.31%)       |
| Oromia            | 746 (37.53%)             | 1,242 (62.47%)     | 1,785 (89.79%)     | 203 (10.21%)      |
| Somali            | 884 (56.52%)             | 680 (43.48%)       | 1,145 (73.21%)     | 419 (26.79%)      |
| Benishangul Gumuz | 271 (21.17%)             | 1,009 (78.83%)     | 1,225 (95.70%)     | 55 (4.30%)        |
| SNNPR             | 775 (40.85%)             | 1,122 (59.15%)     | 1,650 (86.98%)     | 247 (13.02%)      |
| Gambella          | 246 (19.22%)             | 1,034 (80.78%)     | 1,098 (85.78%)     | 182 (14.22%)      |
| Harari            | 179 (15.77%)             | 956 (84.23%)       | 619 (54.54%)       | 516 (45.46%)      |
| Dire Dawa         | 117 (10.08%)             | 1,044 (89.92%)     | 404 (34.80%)       | 757 (65.20%)      |
| Addis Ababa       | 9 (0.60%)                | 1,480 (99.40%)     | 308 (20.69%)       | 1,181 (79.31%)    |
| Total             | 5005(30.06%)             | 11,645<br>(69.94%) | 12,428<br>(74.64%) | 4,222<br>(25.36%) |
